# Supplementary material
Source: publisher figshare collection journal article supplement (https://diabetesjournals.figshare.com/ndownloader/files/28353243)
Supplement: Supplementary file 1 [file 28353243]

## Supplementary Material

**Supplementary Figure 1.** Diagram of multiplicity testing approach.

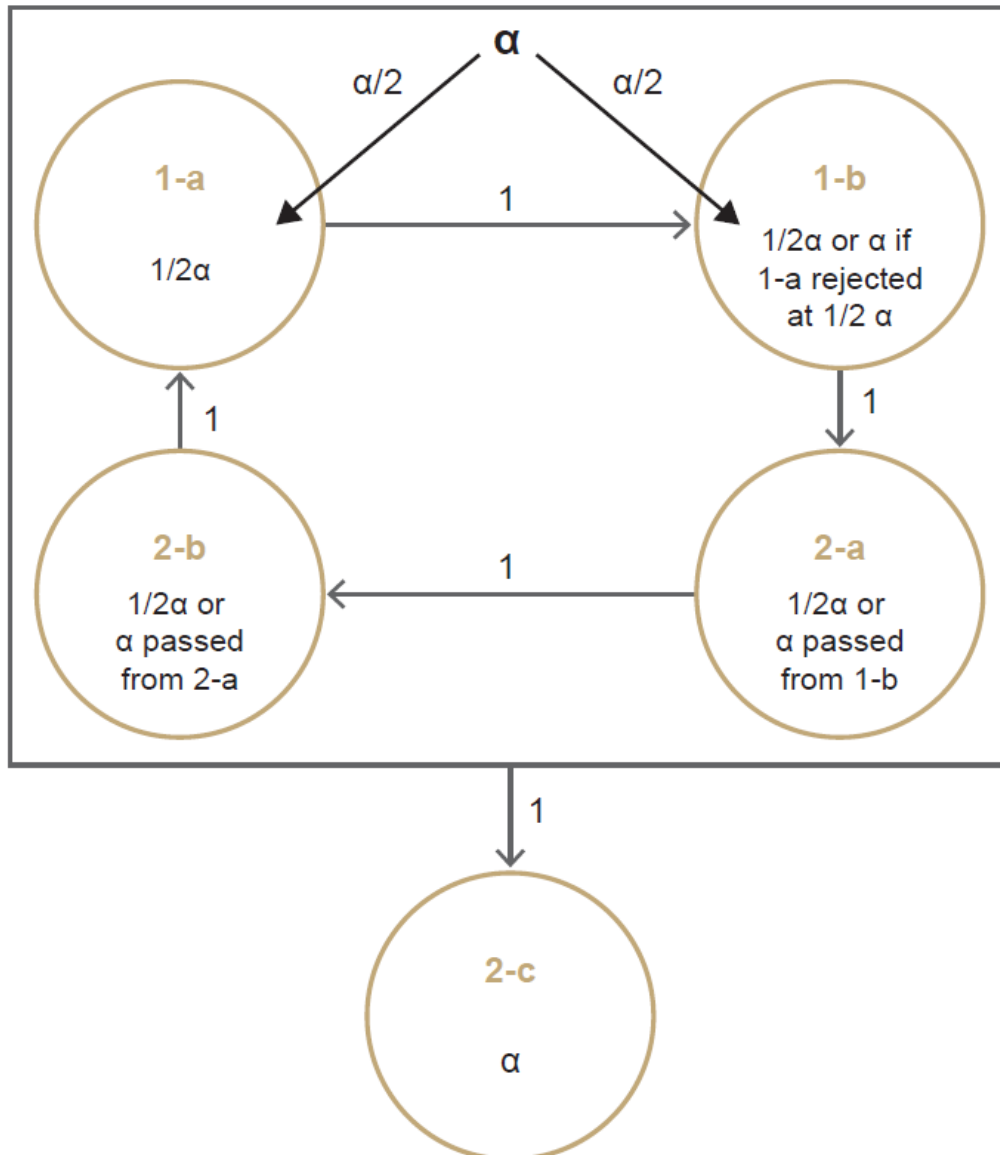

1-a: Non-inferiority of iGlarLixi versus BIAsp 30 on HbA<sub>1c</sub> change from baseline to Week 26; 1-b: Superiority of iGlarLixi versus BIAsp 30 on bodyweight change from baseline to Week 26; 2a: Proportion of participants reaching HbA<sub>1c</sub> target <7 % without weight gain at Week 26; 2b: Proportion of participants reaching HbA<sub>1c</sub> target <7 % without hypoglycemia, and without weight gain at Week 26; 2-c: HbA<sub>1c</sub> reduction from baseline at Week 26. Alpha will be allocated equally among both primary hypotheses (1-a and 1-b).

Test 1-a and 1-b at  $\alpha/2$  each;

- a. If 1-a is significant,  $\alpha/2$  is passed from 1-a to 1-b and 1-b is tested at the full alpha level. If significant, the full alpha is passed to test hierarchically 2-a, 2-b and 2-c at full alpha, each.

- b. If 1-a is not rejected, but 1-b is rejected at  $\alpha/2$  level, test hierarchically 2-a, 2-b at  $\alpha/2$ 
  - i. If significant, use a fallback procedure to pass  $\alpha/2$  back to 1-a and re-test 1-a at an  $\alpha$  level.
  - ii. If 1-a is rejected at the  $\alpha$  level, test 2-c at the full  $\alpha$  level. Essentially, 1-a, 1-b and 2-a and 2-b are put in a box as a gatekeeper for testing 2-c: 2-c can be tested only if 1-a, 1-b, 2-a and 2-b are all rejected.

**Supplementary Figure 2.** Participant disposition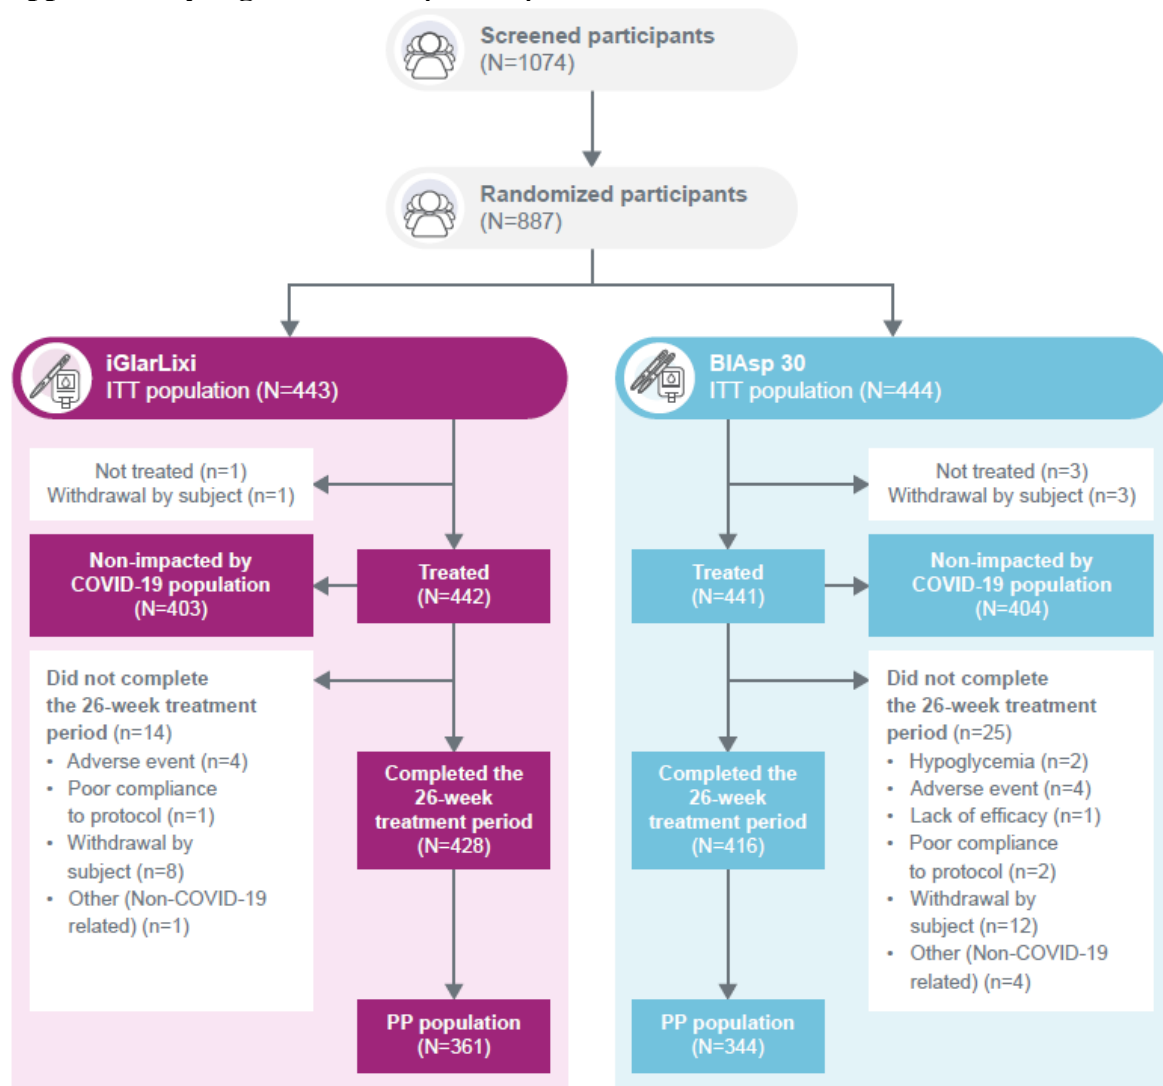

BIAsp 30, biphasic aspart insulin 30 (30% insulin aspart and 70% insulin aspart protamine); iGlarLixi, a fixed-ratio combination of insulin glargine 100 U/mL and the glucagon-like peptide-1 receptor agonist, lixisenatide; ITT, intention-to-treat; PP, per protocol.

**Supplementary Figure 3.** Onset gastrointestinal adverse events reported over time (Safety population)

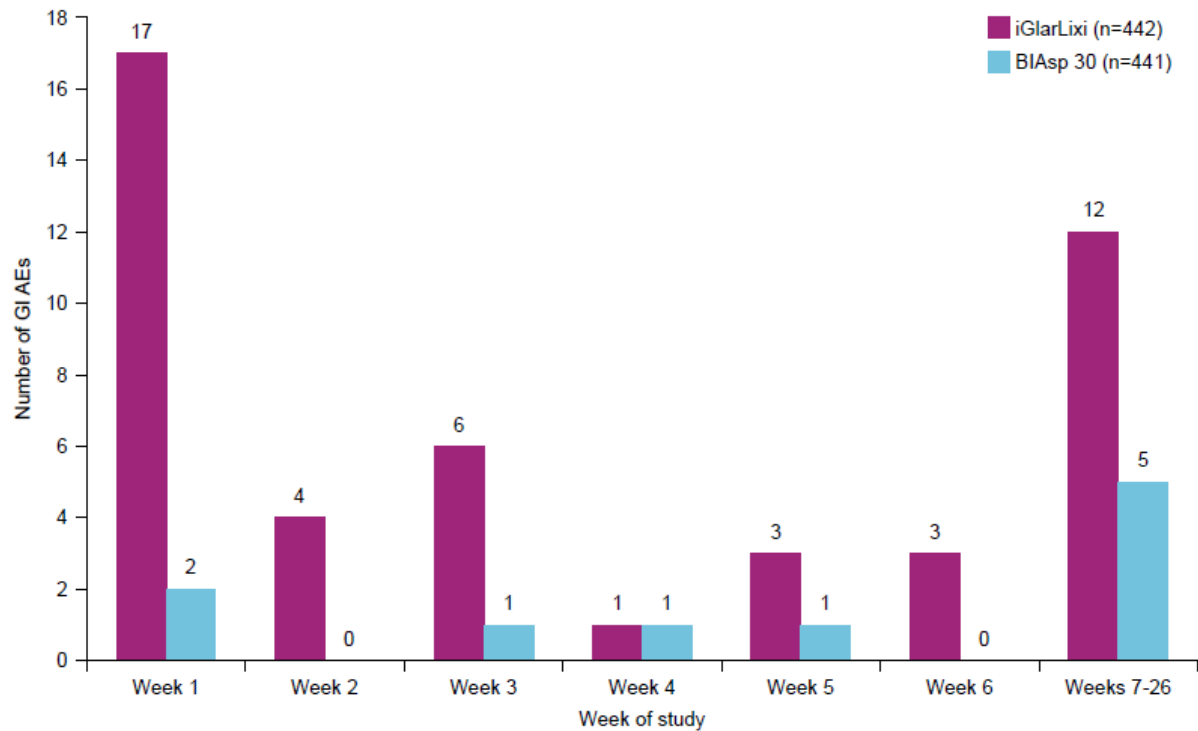

AE, adverse events; BIAsp 30, biphasic aspart insulin 30 (30% insulin aspart and 70% insulin aspart protamine); GI, gastrointestinal; iGlarLixi, a fixed-ratio combination of insulin glargine 100 U/mL and the glucagon-like peptide-1 receptor agonist, lixisenatide.

**Supplementary Table 1.** Starting doses of iGlarLixi from iGlar\*

|                       |                         | Previous therapy                         |                                          |
|-----------------------|-------------------------|------------------------------------------|------------------------------------------|
|                       |                         | iGlar<br>≥20 U to <30 U                  | iGlar<br>≥30 U to ≤50 U                  |
| Starting dose and pen | iGlarLixi<br>10–40 pen† | 20 dose steps<br>(20 U iGlar/10 µg Lixi) |                                          |
|                       | iGlarLixi<br>30–60 pen† |                                          | 30 dose steps<br>(30 U iGlar/10 µg Lixi) |

\*If switching from twice-daily basal insulin or insulin glargine 300 U/mL, the total daily dose previously used should be reduced by 20% to choose the starting dose of iGlarLixi; for any other BI, the same dosing should be followed as shown above for iGlar.

†Suliqua®, Sanofi, Paris, France.

BI, basal insulin; GLP-1 RA, glucagon-like 1 receptor agonist; iGlar, insulin glargine 100 U/mL; iGlarLixi, a fixed-ratio combination of insulin glargine 100 U/mL and the glucagon-like peptide-1 receptor agonist, lixisenatide; Lixi, lixisenatide; mcg, micrograms; OAD, oral antihyperglycemic drug; U, units.

**Supplementary Table 2.** Recommended dose adjustment algorithm for iGlarLixi

| <b>Median of fasting SMPG values from the last<br/>three measurements</b>                                                                                            | <b>iGlarLixi* dose adjustments<br/>(U/day)</b>                                       |
|----------------------------------------------------------------------------------------------------------------------------------------------------------------------|--------------------------------------------------------------------------------------|
| >140 mg/dL (>7.8 mmol/L)                                                                                                                                             | +4                                                                                   |
| >110 to ≤140 mg/dL (>6.1 to ≤7.8 mmol/L)                                                                                                                             | +2                                                                                   |
| Glycemic target: ≥80 to ≤110 mg/dL (≥4.4 to<br>≤6.1 mmol/L)                                                                                                          | No change                                                                            |
| ≥60 and <80 mg/dL (≥3.3 to <4.4 mmol/L)                                                                                                                              | -2                                                                                   |
| <60 mg/dL (<3.3 mmol/L) or occurrence of ≥2<br>symptomatic hypoglycemic episodes or 1 severe<br>hypoglycemic episode (requiring assistance) in the<br>preceding week | -2 to -4 or at the investigator's<br>discretion (or medically qualified<br>designee) |

\*The U/day refers solely to the iGlar component of iGlarLixi.

iGlar, insulin glargine 100 U/mL; iGlarLixi, a fixed-ratio combination of insulin glargine 100 U/mL and the glucagon-like peptide-1 receptor agonist, lixisenatide; SMPG, self-monitored plasma glucose; U, units.

**Supplementary Table 3.** Recommended dose adjustment algorithm for BIAsp 30

| <b>Premeal SMPG values*</b>                           | <b>BIAsp 30 dose adjustments<br/>(U/day)</b> |
|-------------------------------------------------------|----------------------------------------------|
| <80 mg/dL (<4.4 mmol/L)                               | −2                                           |
| <b>Glycemic target:</b> 80–110 mg/dL (4.4–6.1 mmol/L) | No change                                    |
| 111–140 mg/dL (6.2–7.8 mmol/L)                        | +2                                           |
| 141–180 mg/dL (7.9–10.0 mmol/L)                       | +4                                           |
| >180 mg/dL (>10 mmol/L)                               | +6                                           |

\*Titration was based on the lowest of pre-meal SMPG values of the previous 3 days, using pre-dinner SMPG values for breakfast dose adjustment and pre-breakfast SMPG values for the dinner dose adjustment. The dose was not to be increased if hypoglycemia occurred within these days.

BIAsp 30, biphasic aspart insulin 30 (30% insulin aspart and 70% insulin aspart protamine); SMPG, self-monitored plasma glucose; U, units.

**Supplementary Table 4.** Primary and secondary efficacy endpoints (ITT population)

|                                                                                                                                        | <b>iGlarLixi</b><br><b>(n=443)</b>                                             | <b>BIAsp 30</b><br><b>(n=444)</b> |
|----------------------------------------------------------------------------------------------------------------------------------------|--------------------------------------------------------------------------------|-----------------------------------|
| <b>Primary efficacy endpoints</b>                                                                                                      |                                                                                |                                   |
| <b>HbA<sub>1c</sub>, %</b>                                                                                                             |                                                                                |                                   |
| Baseline, mean ± SD                                                                                                                    | 8.61 ± 0.67                                                                    | 8.57 ± 0.65                       |
| Week 26, mean ± SD                                                                                                                     | 7.26 ± 1.06                                                                    | 7.48 ± 0.99                       |
| Change from baseline to Week 26, mean ± SD                                                                                             | -1.36 ± 1.06                                                                   | -1.09 ± 1.02                      |
| LS mean change from baseline to Week 26 ± SE                                                                                           | -1.30 ± 0.06                                                                   | -1.05 ± 0.06                      |
| LS mean difference (97.5% CI)*<br><br>p value for non-inferiority†<br><br>LS mean difference (95% CI)‡<br><br>p value for superiority§ | -0.24 (-0.41, -0.08)<br><br>p<0.001<br><br>-0.24 (-0.39, -0.10)<br><br>p<0.001 |                                   |
| <b>HbA<sub>1c</sub>, mmol/mol</b>                                                                                                      |                                                                                |                                   |
| Baseline, mean ± SD                                                                                                                    | 70.6 ± 7.3                                                                     | 70.2 ± 7.1                        |
| Week 26, mean ± SD                                                                                                                     | 55.8 ± 11.5                                                                    | 58.2 ± 10.8                       |
| Change from baseline to Week 26, mean ± SD                                                                                             | -14.8 ± 11.6                                                                   | -11.9 ± 11.1                      |
| LS mean change from baseline to Week 26 ± SE                                                                                           | -14.2 ± 0.7                                                                    | -11.5 ± 0.7                       |
| LS mean difference (97.5% CI)*<br><br>p value for non-inferiority†<br><br>LS mean difference (95% CI)‡<br><br>p value for superiority§ | -2.6 (-4.5, -0.9)<br><br>p<0.001<br><br>-2.6 (-4.3, -1.1)<br><br>p<0.001       |                                   |
| <b>Bodyweight, kg</b>                                                                                                                  |                                                                                |                                   |
| Baseline, mean ± SD                                                                                                                    | 80.7 ± 16.5                                                                    | 82.2 ± 18.5                       |
| Week 26, mean ± SD                                                                                                                     | 80.2 ± 16.6                                                                    | 83.4 ± 19.0                       |
| Change from baseline to Week 26, mean ± SD                                                                                             | -0.6 ± 3.1                                                                     | +1.3 ± 3.1                        |
| LS mean change from baseline to Week 26 ± SE                                                                                           | -0.70 ± 0.20                                                                   | +1.15 ± 0.20                      |
| LS mean difference (95% CI)‡<br><br>p value for superiority†                                                                           | -1.86 (-2.28, -1.43)<br><br>p<0.001                                            |                                   |
| <b>Key secondary efficacy endpoints</b>                                                                                                |                                                                                |                                   |
| <b>HbA<sub>1c</sub> &lt;7 % without weight gain‡§</b>                                                                                  |                                                                                |                                   |

|                                                                                                                                              |                      |              |
|----------------------------------------------------------------------------------------------------------------------------------------------|----------------------|--------------|
| n (%)                                                                                                                                        | 122 (27.5)           | 55 (12.4)    |
| Odds ratio (95% CI)                                                                                                                          | 2.83 (1.98, 4.04)    |              |
| p value for superiority                                                                                                                      | p<0.001              |              |
| <b>HbA<sub>1c</sub> &lt;7 % without weight gain or hypoglycemia (plasma glucose &lt;70 mg/dL [<math>&lt;3.9</math> mmol/L])<sup>‡§</sup></b> |                      |              |
| n (%)                                                                                                                                        | 86 (19.4)            | 31 (7.0)     |
| Odds ratio (95% CI)                                                                                                                          | 3.40 (2.19, 5.28)    |              |
| p value for superiority                                                                                                                      | p<0.001              |              |
| <b>Other secondary efficacy endpoints</b>                                                                                                    |                      |              |
| <b>FPG, mmol/L</b>                                                                                                                           |                      |              |
| Baseline, mean ± SD                                                                                                                          | 8.37 ± 2.42          | 8.25 ± 2.28  |
| Week 26, mean ± SD                                                                                                                           | 7.22 ± 2.44          | 8.10 ± 2.84  |
| Change from baseline to Week 26, mean ± SD                                                                                                   | -1.12 ± 2.88         | -0.16 ± 3.33 |
| LS mean change from baseline to Week 26 ± SE                                                                                                 | -1.07 ± 0.24         | -0.16 ± 0.27 |
| LS mean difference (95% CI)                                                                                                                  | -0.91 (-1.47, -0.34) |              |
| <b>Total insulin dose, U<sup>§</sup></b>                                                                                                     |                      |              |
| Baseline, mean ± SD                                                                                                                          | 26.4 ± 6.2           | 33.6 ± 11.0  |
| Week 26, mean ± SD                                                                                                                           | 39.7 ± 12.0          | 58.2 ± 23.6  |
| Change from baseline to Week 26, mean ± SD                                                                                                   | 13.4 ± 10.3          | 24.5 ± 20.8  |
| LS mean change from baseline to Week 26 ± SE                                                                                                 | 10.6 ± 1.2           | 22.9 ± 1.1   |
| LS mean difference (95% CI)                                                                                                                  | -12.2 (-14.8, -9.7)  |              |
| <b>HbA<sub>1c</sub> &lt;7 %<sup>§</sup></b>                                                                                                  |                      |              |
| n (%)                                                                                                                                        | 187 (42.2)           | 141 (31.8)   |
| Odds ratio (95% CI)                                                                                                                          | 1.65 (1.25, 2.19)    |              |

\*Endpoint was assessed at the alpha 0.025 level. †Primary efficacy endpoints, non-inferiority of HbA<sub>1c</sub> reduction was assessed using a margin of 0.3 %; ‡Endpoint was assessed at the alpha 0.05 level. §Secondary endpoint. BIAsp 30, biphasic aspart insulin 30 (30% insulin aspart and 70% insulin aspart protamine); CI, confidence interval; FPG, fasting plasma glucose; iGlarLixi, a fixed-ratio combination of insulin glargine 100 U/mL and the glucagon-like peptide-1 receptor agonist, lixisenatide; ITT, intention-to-treat population; LS, least squares; SD, standard deviation; SE, standard error.

**Supplementary Table 5.** Sensitivity analyses of the primary and key secondary efficacy endpoints

|                                                               | iGlarLixi            | BIAsp 30       |
|---------------------------------------------------------------|----------------------|----------------|
| <b>HbA<sub>1c</sub>, %</b>                                    |                      |                |
| <b>PP population</b>                                          | <b>n=361</b>         | <b>n=344</b>   |
| LS mean difference (95% CI)*†                                 | -0.15 (-0.29, -0.01) |                |
| <b>MMRM analysis</b>                                          | <b>n=443</b>         | <b>n=444</b>   |
| LS mean difference (95% CI)*†                                 | -0.20 (-0.33, -0.07) |                |
| <b>Penalized multiple imputation</b>                          | <b>n=443</b>         | <b>n=444</b>   |
| LS mean difference (95% CI)*†                                 | -0.24 (-0.38, -0.09) |                |
| <b>Multiple imputation for COVID-19 impacted participants</b> | <b>n=443</b>         | <b>n=444</b>   |
| LS mean difference (95% CI)*†                                 | -0.24 (-0.39, -0.09) |                |
| <b>ANCOVA during the on-treatment period</b>                  | <b>n=443</b>         | <b>n=444</b>   |
| LS mean difference (95% CI)*†                                 | -0.20 (-0.33, -0.07) |                |
| <b>Non-impacted by COVID-19 population</b>                    | <b>(n=403)</b>       | <b>(n=404)</b> |
| LS mean difference (95% CI)*†                                 | -0.25 (-0.41, -0.10) |                |
| <b>Bodyweight, kg</b>                                         |                      |                |
| <b>MMRM analysis</b>                                          | <b>n=443</b>         | <b>n=444</b>   |
| LS mean difference (95% CI)                                   | -1.87 (-2.28, -1.46) |                |
| p value for superiority                                       | p<0.001              |                |
| <b>Multiple imputation for COVID-19 impacted participants</b> | <b>n=443</b>         | <b>n=444</b>   |
| LS mean difference (95% CI)                                   | -1.85 (-2.29, -1.41) |                |
| p value for superiority                                       | p<0.001              |                |
| <b>ANCOVA during the on-treatment period</b>                  | <b>n=443</b>         | <b>n=444</b>   |
| LS mean difference (95% CI)                                   | -1.89 (-2.31, -1.47) |                |
| p value for superiority                                       | p<0.001              |                |
| <b>Non-impacted by COVID-19 population</b>                    | <b>(n=403)</b>       | <b>(n=404)</b> |
| LS mean difference (95% CI)                                   | -1.85 (-2.31, -1.40) |                |
| p value for superiority                                       | p<0.001              |                |
| <b>HbA<sub>1c</sub> &lt;7 % without weight gain</b>           |                      |                |
| <b>Non-impacted by COVID-19 population</b>                    | <b>(n=403)</b>       | <b>(n=404)</b> |

|                                                                                                                        |                   |                |
|------------------------------------------------------------------------------------------------------------------------|-------------------|----------------|
| n (%)                                                                                                                  | 110 (27.3)        | 53 (13.1)      |
| Odds ratio (95% CI)                                                                                                    | 2.58 (1.79, 3.73) |                |
| p value for superiority                                                                                                | p<0.001           |                |
| <b>HbA<sub>1c</sub> &lt;7 % without weight gain or hypoglycemia<br/>(plasma glucose &lt;70 mg/dL [&lt;3.9 mmol/L])</b> |                   |                |
| <b>Not-impacted by COVID-19 population</b>                                                                             | <b>(n=403)</b>    | <b>(n=404)</b> |
| n (%)                                                                                                                  | 76 (18.9)         | 29 (7.2)       |
| Odds ratio (95% CI)                                                                                                    | 3.16 (2.00, 5.00) |                |
| p value for superiority                                                                                                | p<0.001           |                |

All endpoints were assessed at the alpha 0.05 level. \*Non-inferiority objective confirmed. †Superiority objective confirmed. PP: same ANCOVA model as described for the primary analysis in the PP population (no imputation necessary since patients with missing HbA<sub>1c</sub> were excluded from PP). MMRM: MMRM under the missing at random framework was carried out using an adequate contrast at Visit 10 (Week 26), based on ITT population. Penalized multiple imputation: same ANCOVA model as described for the primary analysis with multiple imputation. A penalty of 0.3 % was added to missing HbA<sub>1c</sub> values in the iGlarLixi group only. Missing related to COVID-19 were not penalized. Multiple imputation for COVID-19 impacted participants: same ANCOVA model as described for the primary analysis in the ITT population, with separate multiple imputation process for COVID-19 impacted and non-impacted patients. Missing data in COVID-19 non-impacted patients were imputed with the same approach as primary analysis (Missing Not At Random). COVID-19 impacted patients were imputed using multiple imputation under the Missing At Random framework. ANCOVA during the on-treatment period: same ANCOVA as primary analysis in the ITT population during the on-treatment period. Only assessments before IMP discontinuation or introduction of the rescue therapy were considered in this analysis. Non-impacted by COVID-19 population: analyzed using the same methodology as primary analysis in the ITT not impacted by COVID-19 population. ANCOVA, analysis of covariance; BIAsp 30, biphasic aspart insulin 30 (30% insulin aspart and 70% insulin aspart protamine); CI, confidence interval; iGlarLixi, a fixed-ratio combination of insulin glargine 100 U/mL and the glucagon-like peptide-1 receptor agonist, lixisenatide; IMP, investigational medicinal product; ITT, intention-to-treat; LS, least squares; MMRM, mixed effect repeated measure; PP, per protocol.

**Supplementary Materials**

List of participating investigators

**Argentina**

Silvia Ines Orio; Gustavo Frechtel; Patricia Castaño; Jimena Coronel; Lucas Rista

**Austria**

Rudolf Prager; Slobodan Peric; Christoph Ebenbichler; Clemens Engel

**Bulgaria**

Dimitar Georgiev; Nkolay Botushanov; Yulia Kavarmova-Toneva; Ghassan Farah; Svilen Stanchev; Atanas Milev; Kiril Kirilov; Dimo Dimov; Petya Goicheva; Zahari Nikitov; Antoaneta Zlateva-Nikolaeva; Tundzhay Yozturk; Darina Vasileva; Valentina Zhelyazkova

**Czech Republic**

Dana Burdova; Marcela Szabo; Marcela Bacterova; Zuzana Kubikova; Katerina Smolenakova; Romana Urbanova; Jan Vrkoc; Tomas Spousta; Romana Urbanova; Jitka Zemanova; Silvie Lacigova; Dagmar Bartaskova; Jana Kostarova; Klaudia Halova-Karoliova; Jan Skopecek; Peter Gajdos; Tomas Edelsberger; Alica Vesela; Edit Novakova

**Greece**

Alexandros Kokkinos; Christos Sampanis; Alexandra Bargiota; Stilianos Tigas

**India**

Balamurugan Ramanathan; Paturi Rao; Rakesh Sahay; Manish Gutch; Teju Velkoor; Srinivasa Murthy; Parminder Singh; Viswanathan Mohan; Vasudha Sardesai; Farishta Faraz; Saurabh Agarwal; Pravin Supe;

**Kingdom of Saudi Arabia**

Abdulrahman Almaghamisi

**Kuwait**

Ebaa Al Ozairi; Monira Al Arouj; Abdullah Bin Nakhi; Dherar Al roudhan

**Mexico**

Ricardo Choza Romero; Leobardo Sauque Reyna; Jose Gerardo Gonzalez Gonzalez; Enrique Ortiz Jimenez; Emilia Susana Pelayo Orozco

**North Macedonia**

Bekjir Mahmudi; Dusica Stefanovska; Vjosa Xhaferi; Zulkjufli Misimi; Cvetanka Volkanovska Ilijevska; Daniela Doneva; Hasan Taner; Ivana Trajkovska; Natasha Nedevska Minova; Iskra Bitoska Mileva; Ivica Smokovski; Katerina Adamova; Sasha Jovanovska Michevska; Tatjana Milenkovic; Ljiljana Necevska

**Romania**

Mihaela Voitec; Alina Mot; Amarin Popa; Eduard Adamescu

**Serbia**

Radivoj Kocic; Sasa Radenkovic; Jelica Bjekic-Macut; Tijana Petrović; Aleksandar Djukic; Ivana Djokic; Jelena Petrovic; Katarina Asanin; Biljana Jojic; Jelena Stojanovic; Marina Andelic Jelic; Milica Marjanovic Petkovic; Miljanka Vuksanovic; Teodora Beljic Zivkovic; Aleksandra Jotic; Ljiljana Lukic; Marija Macesic; Milica Stoilkovic; Nebojsa Lalic; Tanja Milicic; Milica Pesic; Sanja Curkovic; Sonja Kostic

**South Korea**

Kyung Mook Choi; Nan Hee Kim; Kyung Wan Min; Ji Hyun Lee; Eun-Gyoung Hong; Soon-Jib Yoo; Young Min Cho; Hyuk-Sang Kwon; Sang Yong Kim; In-Kyu Lee

**Spain**

Pedro De Pablos; Carlos Trescoli; Ana Silvia Pellitero; Daniel De Luis; Andreea Ciudin; Edelmiro Mendez; Marta Botella

**Sweden**

Hans Larnefeldt; Gunnar Strömblad; Ingemar Torstensson

**Taiwan**

Ching-Chu Chen; Shu-Yi Wang; Kai-Jen Tien; Chen-Ling Huang; Shuen-Fu Weng; Chii-Min Hwu; Horng-Yih Ou

**Turkey**

Fahri Bayram; Adil Begüm Bahçecioğlu Mutlu; Rıfat Emral; Fatma Nur Korkmaz; Abdurrahman Çömlekçi; Başak Saydam; Cem Adıyaman; Tevfik Demir; Canan Ersoy; Soner Cander; Emre Gezer; Zeynep Cantürk; Cem Onur Kirac; Levent Kebapçılar; Suleyman Ipekci; Gulay Simsek Bagir; Okan Sefa Bakiner;
